# Supplementary material for: Kinetic isotope effects of 12 CH 3 D + OH and 13 CH 3 D + OH from 278 to 313 K
Source: Copernicus journal article supplement (doi:10.5194/acp-16-4439-2016), 2016-04-11
Supplement: Supplementary file 1 [file acp-16-4439-2016-supplement.zip]

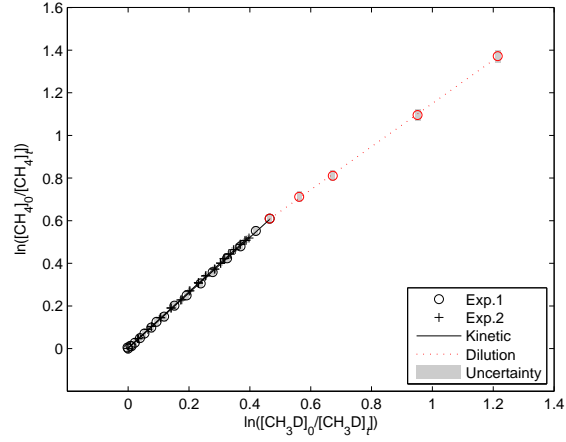

Figure S1: Experiment 1 and 2:  $\text{CH}_3\text{D}$ ,  $T = 298\text{ K}$ . Experimental data are shown using black open circles (Exp. 1) and black plus signs (Exp. 2). Corresponding dilution test points are shown using red symbols. A linear fit of the experimental points is shown using a black solid line and linear fit of the subsequent dilution test are represented by a red dotted line, uncertainties for each point are represented by grey areas.

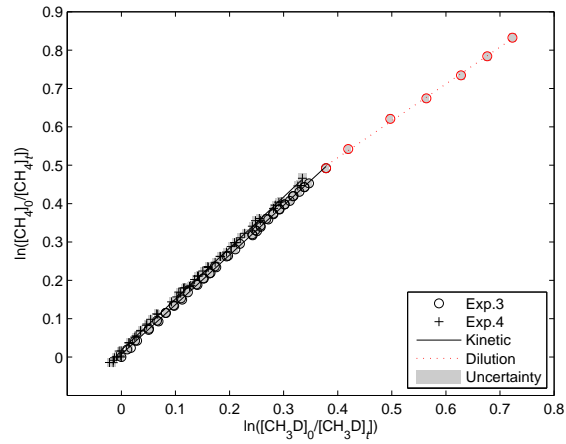

Figure S2: Experiment 3 and 4:  $\text{CH}_3\text{D}$ ,  $T = 278\text{ K}$ . Experimental data are shown using black open circles (Exp. 3) and black plus signs (Exp. 4). Corresponding dilution test points are shown using red symbols. A linear fit of the experimental points is shown using a black solid line and linear fit of the subsequent dilution test are represented by a red dotted line, uncertainties for each point are represented by grey areas.

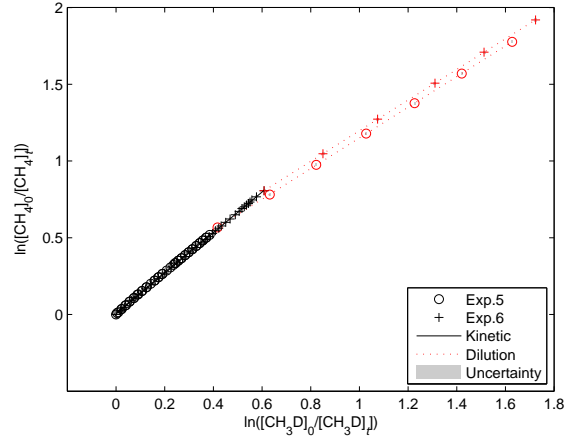

Figure S3: Experiment 5 and 6:  $\text{CH}_3\text{D}$ ,  $T = 288\text{ K}$ . Experimental data are shown using black open circles (Exp. 5) and black plus signs (Exp. 6). Corresponding dilution test points are shown using red symbols. A linear fit of the experimental points is shown using a black solid line and linear fit of the subsequent dilution test are represented by a red dotted line, uncertainties for each point are represented by grey areas.

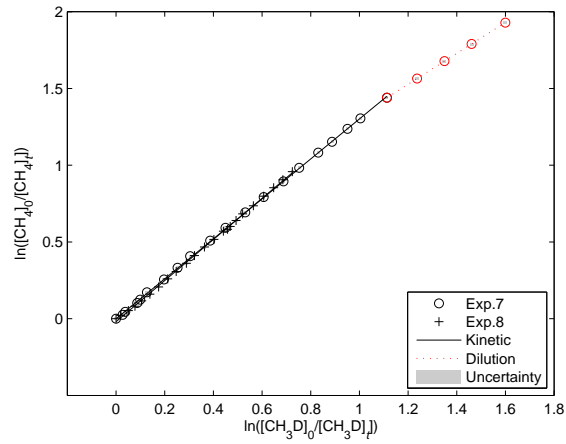

Figure S4: Experiment 7 and 8:  $\text{CH}_3\text{D}$ ,  $T = 313\text{ K}$ . Experimental data are shown using black open circles (Exp. 7) and black plus signs (Exp. 8). Corresponding dilution test points are shown using red symbols. A linear fit of the experimental points is shown using a black solid line and linear fit of the subsequent dilution test are represented by a red dotted line, uncertainties for each point are represented by grey areas.

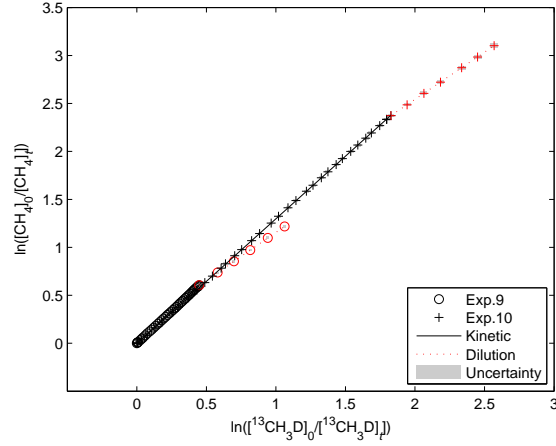

Figure S5: Experiment 9 and 10:  $^{13}\text{CH}_3\text{D}$ ,  $T = 298\text{ K}$ . Experimental data are shown using black open circles (Exp. 9) and black plus signs (Exp. 10). Corresponding dilution test points are shown using red symbols. A linear fit of the experimental points is shown using a black solid line and linear fit of the subsequent dilution test are represented by a red dotted line, uncertainties for each point are represented by grey areas.

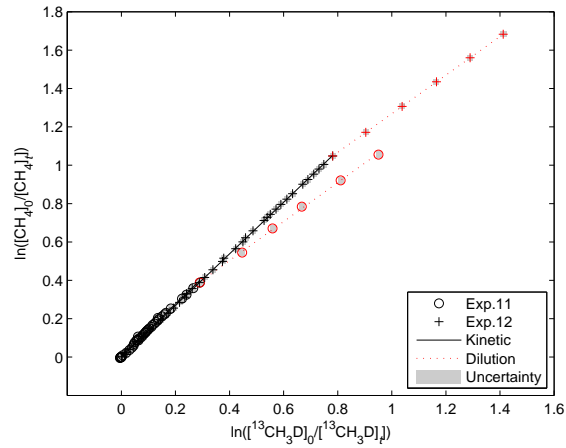

Figure S6: Experiment 11 and 12:  $^{13}\text{CH}_3\text{D}$ ,  $T = 278\text{ K}$ . Experimental data are shown using black open circles (Exp. 11) and black plus signs (Exp. 12). Corresponding dilution test points are shown using red symbols. A linear fit of the experimental points is shown using a black solid line and linear fit of the subsequent dilution test are represented by a red dotted line, uncertainties for each point are represented by grey areas.

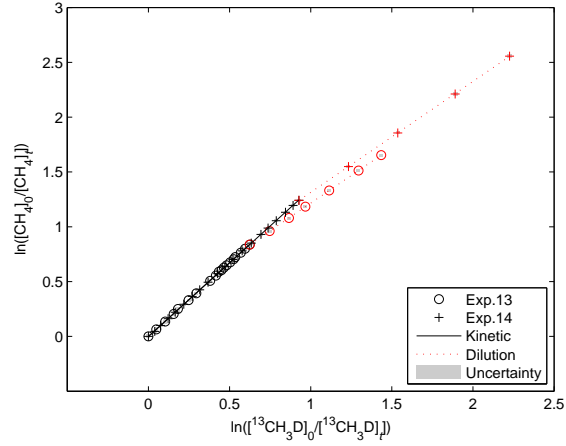

Figure S7: Experiment 13 and 14:  $^{13}\text{CH}_3\text{D}$ ,  $T = 288\text{ K}$ . Experimental data are shown using black open circles (Exp. 13) and black plus signs (Exp. 14). Corresponding dilution test points are shown using red symbols. A linear fit of the experimental points is shown using a black solid line and linear fit of the subsequent dilution test are represented by a red dotted line, uncertainties for each point are represented by grey areas.

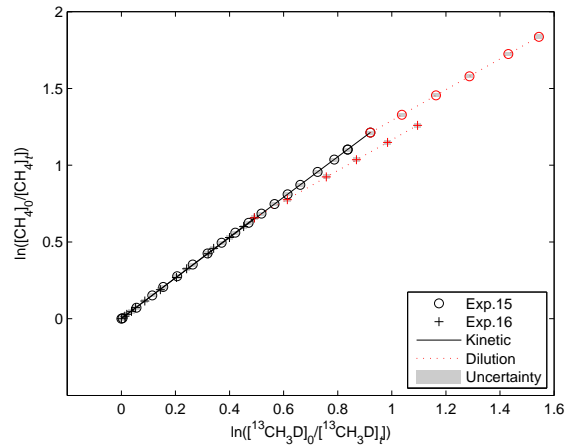

Figure S8: Experiment 15 and 16:  $^{13}\text{CH}_3\text{D}$ ,  $T = 313\text{ K}$ . Experimental data are shown using black open circles (Exp. 15) and black plus signs (Exp. 16). Corresponding dilution test points are shown using red symbols. A linear fit of the experimental points is shown using a black solid line and linear fit of the subsequent dilution test are represented by a red dotted line, uncertainties for each point are represented by grey areas.
