# Supplementary material for: Kinetic isotope effects of 12 CH 3 D + OH and 13 CH 3 D + OH from 278 to 313 K
Source: Copernicus journal article supplement (doi:10.5194/acp-16-4439-2016), 2016-04-11
Supplement: Supplementary file 2 [file acp-16-4439-2016-supplement.zip]

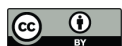

*Supplement of*

## **Kinetic isotope effects of $^{12}\text{CH}_3\text{D} + \text{OH}$ and $^{13}\text{CH}_3\text{D} + \text{OH}$ from 278 to 313 K**

**L. M. T. Joelsson et al.**

*Correspondence to:* M. S. Johnson (msj@chem.ku.dk)

- acp-16-4439-2016-supplement-title-page.pdf
- Theoretical\_calculations.xls
- supplement.pdf

The copyright of individual parts of the supplement might differ from the CC-BY 3.0 licence.
